# Supplementary material
Source: Springer Nature journal article supplement (https://www.springermedizin.de/resource/supplementary/12936_2011_1983_MOESM7_ESM.pdf/9542164)

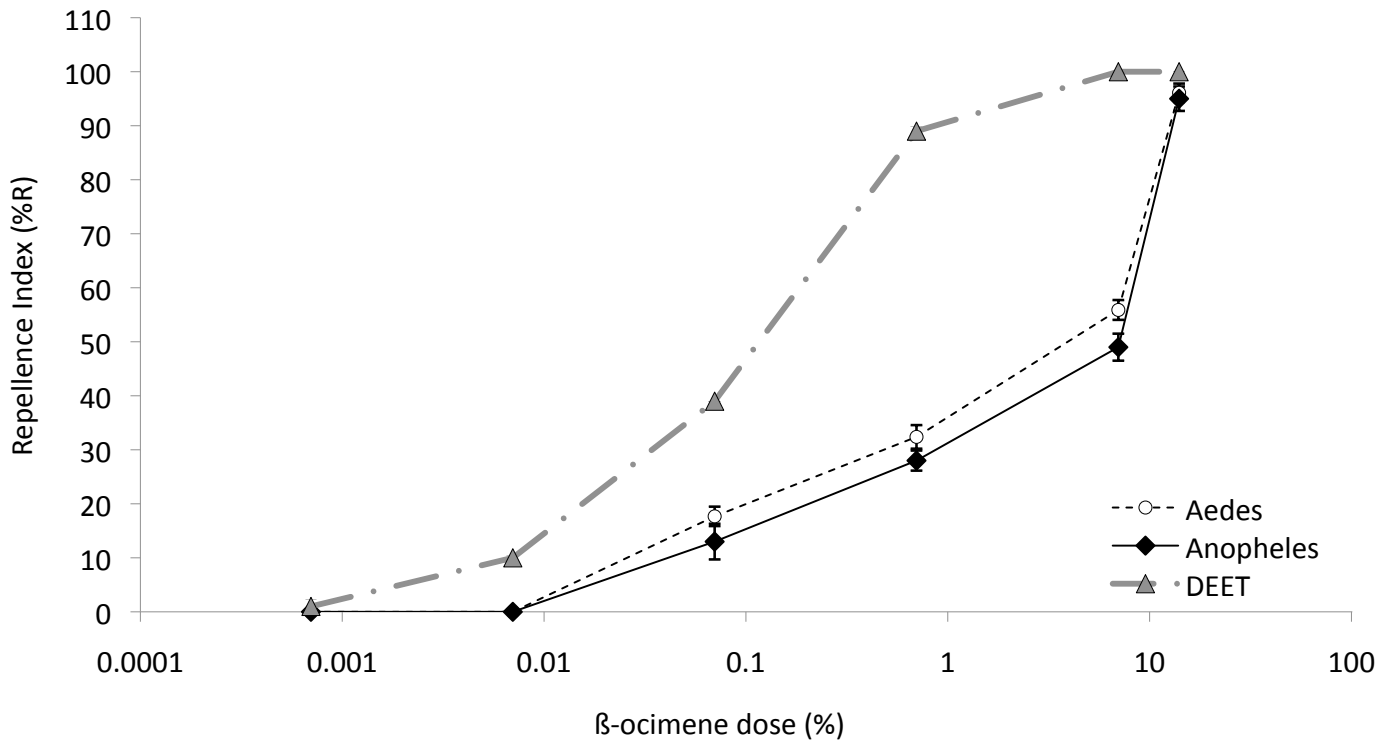

Supplement: MOESM7 [file 9542164]
